# Supplementary material for: Comparative Analysis of the Volatile Fraction of Fruit Juice from Different Citrus Species
Source: PLoS One. 2011 Jul 19;6(7):e22016. doi: 10.1371/journal.pone.0022016 (PMC3139606; doi:10.1371/journal.pone.0022016)
Supplement: Table S1 — Pearson correlation coefficients for each of the volatile compounds. Significant correlations (p<0.01) are highlighted in bold. (XLS) [file pone.0022016.s004.xls]

## Sheet: Hoja1
Compound	6-methyl-5-hepten-2-one	octanal	(E,E)-2,4-decadienal	heptanal	(E)-2-octenal	nonanal	2,3-pentanedione	(E)-2-nonenal	2-methylfuran	2-ethylfuran	(E)-2-heptenal	2-pentylfuran	hexanal	1-octen-3-ol	pentanal	1-octen-3-one	1-heptanol	1-pentanol	(E,E)-2,4-nonadienal	(E)-linalool oxide	(Z)-linalool oxide	p-cymene	(Z)-ocimene	nootkatone	alpha-humulene	2-carene	beta-caryophyllene	beta-pinene	alpha-copaene	bornyl acetate	ethyl heptanoate	propyl acetate	3-pentanone	1-penten-3-ol	(Z)-3-hexenal	beta-cyclocitral	beta-citronellal	geranylacetone	decanal	beta-ionone	(E)-2-pentenal	1-penten-3-one	ethyl propanoate	ethyl 2-methylbutanoate	methyl hexanoate	1-hexanol	pseudocumene	valencene	ethyl hexanoate
6-methyl-5-hepten-2-one	1	0.938432	0.841655	0.867746	0.835901	0.916595	0.902498	0.753672	0.761859	0.756616	0.875886	0.730478	0.735129	0.716832	0.697886	0.672052	0.627381	0.447831	0.63616	0.635049	0.637371	0.638256	0.636325	0.572908	0.489395	0.4652	0.367222	0.338657	0.229699	0.305254	-0.187786	-0.162079	0.672803	0.438373	0.326302	0.398209	0.285937	0.191044	0.225321	0.244613	0.615362	0.473427	0.313459	0.294128	-0.0860352	-0.192394	-0.123961	-0.386003	-0.56521
octanal	0.938432	1	0.790727	0.76079	0.754628	0.867806	0.810638	0.685716	0.700328	0.694862	0.826484	0.595911	0.667294	0.640399	0.622745	0.632496	0.585404	0.484035	0.623413	0.620408	0.625697	0.617738	0.608133	0.54583	0.462644	0.472534	0.355813	0.381572	0.179805	0.243829	-0.173038	-0.23045	0.628225	0.383547	0.420473	0.380057	0.404979	0.179806	0.400147	0.254402	0.59425	0.457853	0.252824	0.248224	-0.0965007	-0.200356	-0.104796	-0.441383	-0.586354
(E,E)-2,4-decadienal	0.841655	0.790727	1	0.823053	0.847505	0.836933	0.828348	0.77458	0.705336	0.70213	0.805429	0.746205	0.691365	0.658136	0.657506	0.679332	0.491057	0.473305	0.561701	0.554142	0.571213	0.556922	0.550511	0.474176	0.46551	0.236803	0.3495	0.251531	0.216521	0.232434	-0.0893785	-0.150619	0.530012	0.262725	0.288155	0.325508	0.215872	0.160503	0.169998	0.19186	0.490309	0.376121	0.250372	0.265892	-0.0378702	-0.223318	-0.0959281	-0.301854	-0.432857
heptanal	0.867746	0.76079	0.823053	1	0.948705	0.941804	0.968899	0.904575	0.814588	0.791345	0.895791	0.917853	0.82328	0.80738	0.825708	0.727363	0.655542	0.425779	0.550463	0.549077	0.549449	0.544321	0.538472	0.488291	0.48954	0.305056	0.315377	0.200398	0.312135	0.333147	0.151488	0.108932	0.585817	0.387403	0.0879675	0.218941	0.167723	0.0373734	-0.104204	0.0639474	0.535127	0.407751	0.3969	0.284245	-0.0283428	-0.180483	-0.163556	-0.166696	-0.328709
(E)-2-octenal	0.835901	0.754628	0.847505	0.948705	1	0.941929	0.948577	0.952196	0.820365	0.792586	0.905765	0.856633	0.750714	0.720259	0.764889	0.775212	0.596385	0.375842	0.501441	0.497674	0.499341	0.492998	0.494656	0.454796	0.460002	0.25306	0.288265	0.156329	0.294073	0.364417	0.0527786	0.0605266	0.548882	0.296753	0.189951	0.269748	0.227988	0.0816564	0.00502454	0.135488	0.570903	0.446607	0.388623	0.294223	-0.0774325	-0.262112	-0.170556	-0.207732	-0.411998
nonanal	0.916595	0.867806	0.836933	0.941804	0.941929	1	0.972371	0.930885	0.846529	0.834948	0.893672	0.777467	0.720775	0.69896	0.710647	0.700775	0.648757	0.334665	0.517428	0.515058	0.521956	0.515006	0.50877	0.471525	0.453796	0.335168	0.254387	0.245482	0.303866	0.391946	0.058154	0.149425	0.588114	0.26815	0.146824	0.267326	0.245865	0.00652381	0.0832767	0.115159	0.63956	0.512188	0.48912	0.358024	-0.162695	-0.332294	-0.315003	-0.245755	-0.538527
2,3-pentanedione	0.902498	0.810638	0.828348	0.968899	0.948577	0.972371	1	0.927236	0.890888	0.872941	0.87152	0.823359	0.727784	0.703491	0.729262	0.674037	0.591981	0.320418	0.474469	0.47091	0.472976	0.476864	0.468186	0.431634	0.411205	0.279417	0.221527	0.163688	0.25908	0.337132	0.0353895	0.126559	0.622957	0.369895	0.15532	0.313417	0.23455	0.0695041	0.0382468	0.156348	0.658874	0.545507	0.501094	0.40306	-0.175863	-0.337451	-0.29619	-0.254251	-0.506626
(E)-2-nonenal	0.753672	0.685716	0.77458	0.904575	0.952196	0.930885	0.927236	1	0.884067	0.876141	0.780011	0.725465	0.577851	0.549698	0.595629	0.601139	0.495551	0.215677	0.272699	0.267463	0.274033	0.266838	0.264196	0.228163	0.250699	0.0488354	0.0352661	-0.0242532	0.180449	0.34237	0.106999	0.275229	0.592426	0.268657	0.127184	0.319743	0.287495	0.0574617	0.0514691	0.187954	0.677045	0.599362	0.615397	0.4893	-0.303906	-0.468464	-0.422186	-0.254752	-0.52298
2-methylfuran	0.761859	0.700328	0.705336	0.814588	0.820365	0.846529	0.890888	0.884067	1	0.970324	0.638726	0.561902	0.415638	0.385162	0.424492	0.392594	0.273089	0.148194	0.107971	0.102098	0.102317	0.109295	0.113579	0.0638428	0.0272298	-0.0887185	-0.164429	-0.188077	-0.0468982	0.231258	-0.0421691	0.1667	0.759057	0.500419	0.293238	0.565252	0.49271	0.261588	0.301427	0.425219	0.885588	0.830233	0.723147	0.70094	-0.515878	-0.635406	-0.509442	-0.480263	-0.698217
2-ethylfuran	0.756616	0.694862	0.70213	0.791345	0.792586	0.834948	0.872941	0.876141	0.970324	1	0.590968	0.51337	0.343512	0.318314	0.342213	0.293866	0.283176	0.0648355	0.0503713	0.0467754	0.0520739	0.0462545	0.0463784	-0.00787522	-0.056278	-0.12313	-0.238819	-0.25036	-0.147371	0.133738	-0.105428	0.161791	0.807215	0.517398	0.300085	0.628688	0.480103	0.325333	0.350428	0.505165	0.903833	0.860964	0.780562	0.782979	-0.603313	-0.664385	-0.583771	-0.565552	-0.757868
(E)-2-heptenal	0.875886	0.826484	0.805429	0.895791	0.905765	0.893672	0.87152	0.780011	0.638726	0.590968	1	0.881715	0.902209	0.890664	0.900387	0.904172	0.751005	0.56139	0.78214	0.782155	0.782928	0.773737	0.777952	0.742201	0.718719	0.536988	0.593012	0.501298	0.479715	0.447213	0.0469248	-0.102114	0.405447	0.195472	0.169103	0.0706922	0.0597958	-0.0543616	-0.0763857	-0.0709099	0.38058	0.198008	0.0934727	-0.00748997	0.224774	0.0266386	0.075945	-0.0558242	-0.260488
2-pentylfuran	0.730478	0.595911	0.746205	0.917853	0.856633	0.777467	0.823359	0.725465	0.561902	0.51337	0.881715	1	0.935216	0.925475	0.945806	0.832355	0.698915	0.557164	0.711098	0.709579	0.706425	0.705706	0.700229	0.657675	0.690928	0.432419	0.575854	0.367928	0.486434	0.330346	0.248774	-0.0176394	0.348074	0.277837	-0.0074866	-0.0262017	-0.049158	-0.0611178	-0.360479	-0.159683	0.203321	0.0561144	0.0573916	-0.0583913	0.325718	0.163741	0.174804	0.084513	0.0313203
hexanal	0.735129	0.667294	0.691365	0.82328	0.750714	0.720775	0.727784	0.577851	0.415638	0.343512	0.902209	0.935216	1	0.993282	0.992042	0.909748	0.769188	0.678297	0.892939	0.890638	0.886112	0.884749	0.878123	0.840431	0.854982	0.642441	0.775326	0.613028	0.598605	0.395432	0.219319	-0.133118	0.21937	0.179579	0.00428037	-0.16946	-0.121574	-0.184915	-0.337189	-0.303067	0.0639276	-0.114752	-0.163402	-0.287025	0.523526	0.332103	0.339215	0.171587	0.09776
1-octen-3-ol	0.716832	0.640399	0.658136	0.80738	0.720259	0.69896	0.703491	0.549698	0.385162	0.318314	0.890664	0.925475	0.993282	1	0.984989	0.890788	0.805155	0.673961	0.89169	0.893443	0.889932	0.882914	0.883141	0.842753	0.855043	0.64541	0.774983	0.63146	0.611833	0.428859	0.256229	-0.109095	0.200502	0.168023	-0.0375057	-0.203546	-0.159443	-0.215296	-0.378663	-0.338202	0.0435199	-0.139377	-0.167916	-0.302882	0.539632	0.370207	0.335314	0.202572	0.128896
pentanal	0.697886	0.622745	0.657506	0.825708	0.764889	0.710647	0.729262	0.595629	0.424492	0.342213	0.900387	0.945806	0.992042	0.984989	1	0.918194	0.746614	0.660429	0.85719	0.855803	0.850269	0.850817	0.84457	0.814713	0.839697	0.612655	0.754392	0.581917	0.606102	0.418121	0.244609	-0.100556	0.199394	0.167724	-0.014261	-0.185376	-0.133131	-0.192618	-0.377367	-0.315722	0.0611734	-0.110908	-0.154599	-0.289269	0.524298	0.32145	0.339019	0.208325	0.126656
1-octen-3-one	0.672052	0.632496	0.679332	0.727363	0.775212	0.700775	0.674037	0.601139	0.392594	0.293866	0.904172	0.832355	0.909748	0.890788	0.918194	1	0.685496	0.612696	0.851759	0.846287	0.844121	0.845638	0.856894	0.829353	0.859193	0.612501	0.779625	0.634745	0.652623	0.569628	0.132065	-0.141632	0.114633	-0.0177506	0.0978031	-0.179075	-0.134602	-0.208618	-0.262453	-0.295178	0.0673851	-0.109227	-0.210148	-0.339091	0.514774	0.241865	0.345321	0.217885	0.0284838
1-heptanol	0.627381	0.585404	0.491057	0.655542	0.596385	0.648757	0.591981	0.495551	0.273089	0.283176	0.751005	0.698915	0.769188	0.805155	0.746614	0.685496	1	0.432379	0.721634	0.733352	0.742591	0.703485	0.707235	0.686462	0.678635	0.624155	0.571959	0.545729	0.493613	0.446229	0.293187	0.0840338	0.139001	0.0388066	-0.228075	-0.23926	-0.141008	-0.326339	-0.317059	-0.350294	0.0854049	-0.100529	0.00944574	-0.203505	0.34913	0.379856	0.0944809	0.122148	-0.000416477
1-pentanol	0.447831	0.484035	0.473305	0.425779	0.375842	0.334665	0.320418	0.215677	0.148194	0.0648355	0.56139	0.557164	0.678297	0.673961	0.660429	0.612696	0.432379	1	0.654016	0.649524	0.650309	0.64518	0.64699	0.554594	0.562913	0.326059	0.603223	0.441181	0.28081	0.218318	0.00363305	-0.486762	0.254256	0.277129	0.30726	0.0220359	0.166337	0.166151	-0.00847528	-0.0481633	-0.0489971	-0.163737	-0.382824	-0.346012	0.505538	0.457795	0.590625	-0.0444254	0.208568
(E,E)-2,4-nonadienal	0.63616	0.623413	0.561701	0.550463	0.501441	0.517428	0.474469	0.272699	0.107971	0.0503713	0.78214	0.711098	0.892939	0.89169	0.85719	0.851759	0.721634	0.654016	1	0.9974	0.993735	0.992006	0.990219	0.964553	0.941529	0.844228	0.937238	0.841145	0.64713	0.355829	0.0617182	-0.329425	0.000223593	-0.0161567	0.0573394	-0.292022	-0.254127	-0.248542	-0.255117	-0.39102	-0.158469	-0.351456	-0.453424	-0.532281	0.692139	0.505077	0.51392	0.236729	0.156347
(E)-linalool oxide	0.635049	0.620408	0.554142	0.549077	0.497674	0.515058	0.47091	0.267463	0.102098	0.0467754	0.782155	0.709579	0.890638	0.893443	0.855803	0.846287	0.733352	0.649524	0.9974	1	0.996999	0.989042	0.988712	0.967512	0.941357	0.847004	0.936535	0.845641	0.648522	0.366873	0.0613744	-0.329394	-0.00161664	-0.0156059	0.033447	-0.293049	-0.254104	-0.247494	-0.257335	-0.389555	-0.158082	-0.354311	-0.449775	-0.532232	0.693604	0.512399	0.508946	0.24001	0.157884
(Z)-linalool oxide	0.637371	0.625697	0.571213	0.549449	0.499341	0.521956	0.472976	0.274033	0.102317	0.0520739	0.782928	0.706425	0.886112	0.889932	0.850269	0.844121	0.742591	0.650309	0.993735	0.996999	1	0.985871	0.984737	0.962826	0.941038	0.836607	0.932232	0.84827	0.65264	0.375944	0.0647117	-0.3208	-0.00041287	-0.0283999	0.0241209	-0.29174	-0.255198	-0.24969	-0.252264	-0.387995	-0.15539	-0.350252	-0.438466	-0.524618	0.686574	0.508843	0.496502	0.238566	0.150309
p-cymene	0.638256	0.617738	0.556922	0.544321	0.492998	0.515006	0.476864	0.266838	0.109295	0.0462545	0.773737	0.705706	0.884749	0.882914	0.850817	0.845638	0.703485	0.64518	0.992006	0.989042	0.985871	1	0.988944	0.96474	0.946749	0.836848	0.938988	0.869787	0.671655	0.371547	0.0445366	-0.32886	0.00566357	-0.0210632	0.0661658	-0.287967	-0.253692	-0.243264	-0.261024	-0.390793	-0.166692	-0.341638	-0.452543	-0.53137	0.684049	0.501031	0.511273	0.251669	0.155329
(Z)-ocimene	0.636325	0.608133	0.550511	0.538472	0.494656	0.50877	0.468186	0.264196	0.113579	0.0463784	0.777952	0.700229	0.878123	0.883141	0.84457	0.856894	0.707235	0.64699	0.990219	0.988712	0.984737	0.988944	1	0.968827	0.942706	0.834941	0.934388	0.855862	0.683982	0.411917	0.0567775	-0.327145	0.00205625	-0.0107527	0.0911606	-0.285207	-0.252369	-0.24257	-0.261815	-0.386912	-0.151374	-0.338039	-0.45131	-0.528598	0.683184	0.496834	0.511433	0.256168	0.155779
nootkatone	0.572908	0.54583	0.474176	0.488291	0.454796	0.471525	0.431634	0.228163	0.0638428	-0.00787522	0.742201	0.657675	0.840431	0.842753	0.814713	0.829353	0.686462	0.554594	0.964553	0.967512	0.962826	0.96474	0.968827	1	0.96989	0.861599	0.94424	0.863933	0.770132	0.343873	0.0573663	-0.251502	-0.123531	-0.131567	-0.0304583	-0.388879	-0.311513	-0.350373	-0.320566	-0.474219	-0.20956	-0.396928	-0.450809	-0.56835	0.707611	0.484239	0.471915	0.368649	0.172436
alpha-humulene	0.489395	0.462644	0.46551	0.48954	0.460002	0.453796	0.411205	0.250699	0.0272298	-0.056278	0.718719	0.690928	0.854982	0.855043	0.839697	0.859193	0.678635	0.562913	0.941529	0.941357	0.941038	0.946749	0.942706	0.96989	1	0.80909	0.955988	0.866633	0.851435	0.405545	0.2176	-0.142248	-0.212484	-0.23313	-0.12989	-0.503781	-0.375101	-0.446899	-0.448686	-0.58456	-0.31168	-0.476331	-0.464394	-0.634052	0.766207	0.507846	0.487433	0.500011	0.298247
2-carene	0.4652	0.472534	0.236803	0.305056	0.25306	0.335168	0.279417	0.0488354	-0.0887185	-0.12313	0.536988	0.432419	0.642441	0.64541	0.612655	0.612501	0.624155	0.326059	0.844228	0.847004	0.836607	0.836848	0.834941	0.861599	0.80909	1	0.810147	0.812509	0.605421	0.284607	0.0459366	-0.18812	-0.188969	-0.130789	-0.0799069	-0.387688	-0.310901	-0.368048	-0.243284	-0.448852	-0.254462	-0.415752	-0.426242	-0.559236	0.609917	0.47095	0.397515	0.29488	0.13638
beta-caryophyllene	0.367222	0.355813	0.3495	0.315377	0.288265	0.254387	0.221527	0.0352661	-0.164429	-0.238819	0.593012	0.575854	0.775326	0.774983	0.754392	0.779625	0.571959	0.603223	0.937238	0.936535	0.932232	0.938988	0.934388	0.94424	0.955988	0.810147	1	0.873769	0.732964	0.313412	0.084741	-0.365435	-0.263772	-0.205109	-0.0359159	-0.482107	-0.41798	-0.32619	-0.40047	-0.531948	-0.446381	-0.606761	-0.68212	-0.76116	0.872288	0.6673	0.695472	0.462953	0.410504
beta-pinene	0.338657	0.381572	0.251531	0.200398	0.156329	0.245482	0.163688	-0.0242532	-0.188077	-0.25036	0.501298	0.367928	0.613028	0.63146	0.581917	0.634745	0.545729	0.441181	0.841145	0.845641	0.84827	0.869787	0.855862	0.863933	0.866633	0.812509	0.873769	1	0.726132	0.456673	0.115648	-0.189678	-0.312782	-0.362735	-0.0864271	-0.53182	-0.438548	-0.473006	-0.31305	-0.595821	-0.388727	-0.517568	-0.560631	-0.685388	0.716743	0.529811	0.454038	0.476932	0.275506
alpha-copaene	0.229699	0.179805	0.216521	0.312135	0.294073	0.303866	0.25908	0.180449	-0.0468982	-0.147371	0.479715	0.486434	0.598605	0.611833	0.606102	0.652623	0.493613	0.28081	0.64713	0.648522	0.65264	0.671655	0.683982	0.770132	0.851435	0.605421	0.732964	0.726132	1	0.418019	0.411089	0.225739	-0.422359	-0.448367	-0.335307	-0.679677	-0.430513	-0.664946	-0.604185	-0.731049	-0.400491	-0.483394	-0.291245	-0.572557	0.629023	0.340221	0.245552	0.751646	0.36354
bornyl acetate	0.305254	0.243829	0.232434	0.333147	0.364417	0.391946	0.337132	0.34237	0.231258	0.133738	0.447213	0.330346	0.395432	0.428859	0.418121	0.569628	0.446229	0.218318	0.355829	0.366873	0.375944	0.371547	0.411917	0.343873	0.405545	0.284607	0.313412	0.456673	0.418019	1	0.263379	0.257901	-0.0119305	-0.229783	-0.154668	-0.207768	-0.265394	-0.337534	-0.292502	-0.322023	0.110474	0.0108516	0.0126335	-0.19192	0.226795	0.0561366	0.00933523	0.287761	-0.0107077
ethyl heptanoate	-0.187786	-0.173038	-0.0893785	0.151488	0.0527786	0.058154	0.0353895	0.106999	-0.0421691	-0.105428	0.0469248	0.248774	0.219319	0.256229	0.244609	0.132065	0.293187	0.00363305	0.0617182	0.0613744	0.0647117	0.0445366	0.0567775	0.0573663	0.2176	0.0459366	0.084741	0.115648	0.411089	0.263379	1	0.609314	-0.359362	-0.25638	-0.558952	-0.61043	-0.189202	-0.626885	-0.606823	-0.634426	-0.27179	-0.295714	0.0638998	-0.240125	0.247078	0.182972	-0.0657999	0.537966	0.511013
propyl acetate	-0.162079	-0.23045	-0.150619	0.108932	0.0605266	0.149425	0.126559	0.275229	0.1667	0.161791	-0.102114	-0.0176394	-0.133118	-0.109095	-0.100556	-0.141632	0.0840338	-0.486762	-0.329425	-0.329394	-0.3208	-0.32886	-0.327145	-0.251502	-0.142248	-0.18812	-0.365435	-0.189678	0.225739	0.257901	0.609314	1	-0.242247	-0.401543	-0.681719	-0.387742	-0.252483	-0.640809	-0.461431	-0.433164	0.0735238	0.117503	0.581218	0.24107	-0.276923	-0.385707	-0.68761	0.411591	-0.0260486
3-pentanone	0.672803	0.628225	0.530012	0.585817	0.548882	0.588114	0.622957	0.592426	0.759057	0.807215	0.405447	0.348074	0.21937	0.200502	0.199394	0.114633	0.139001	0.254256	0.000223593	-0.00161664	-0.00041287	0.00566357	0.00205625	-0.123531	-0.212484	-0.188969	-0.263772	-0.312782	-0.422359	-0.0119305	-0.359362	-0.242247	1	0.8093	0.579829	0.870543	0.648428	0.728747	0.546038	0.78336	0.816561	0.808241	0.554238	0.714272	-0.561347	-0.427544	-0.268739	-0.813093	-0.663051
1-penten-3-ol	0.438373	0.383547	0.262725	0.387403	0.296753	0.26815	0.369895	0.268657	0.500419	0.517398	0.195472	0.277837	0.179579	0.168023	0.167724	-0.0177506	0.0388066	0.277129	-0.0161567	-0.0156059	-0.0283999	-0.0210632	-0.0107527	-0.131567	-0.23313	-0.130789	-0.205109	-0.362735	-0.448367	-0.229783	-0.25638	-0.401543	0.8093	1	0.546936	0.739574	0.658369	0.725471	0.422791	0.689912	0.546174	0.55392	0.282137	0.492914	-0.353015	-0.121264	0.0203976	-0.719732	-0.315801
(Z)-3-hexenal	0.326302	0.420473	0.288155	0.0879675	0.189951	0.146824	0.15532	0.127184	0.293238	0.300085	0.169103	-0.0074866	0.00428037	-0.0375057	-0.014261	0.0978031	-0.228075	0.30726	0.0573394	0.033447	0.0241209	0.0661658	0.0911606	-0.0304583	-0.12989	-0.0799069	-0.0359159	-0.0864271	-0.335307	-0.154668	-0.558952	-0.681719	0.579829	0.546936	1	0.692957	0.579309	0.742287	0.714147	0.699671	0.400557	0.428463	-0.0486244	0.266927	-0.261169	-0.211556	0.184663	-0.660867	-0.404284
beta-cyclocitral	0.398209	0.380057	0.325508	0.218941	0.269748	0.267326	0.313417	0.319743	0.565252	0.628688	0.0706922	-0.0262017	-0.16946	-0.203546	-0.185376	-0.179075	-0.23926	0.0220359	-0.292022	-0.293049	-0.29174	-0.287967	-0.285207	-0.388879	-0.503781	-0.387688	-0.482107	-0.53182	-0.679677	-0.207768	-0.61043	-0.387742	0.870543	0.739574	0.692957	1	0.722888	0.896588	0.779536	0.977949	0.77335	0.818329	0.487307	0.765179	-0.70389	-0.539771	-0.275054	-0.93351	-0.724304
beta-citronellal	0.285937	0.404979	0.215872	0.167723	0.227988	0.245865	0.23455	0.287495	0.49271	0.480103	0.0597958	-0.049158	-0.121574	-0.159443	-0.133131	-0.134602	-0.141008	0.166337	-0.254127	-0.254104	-0.255198	-0.253692	-0.252369	-0.311513	-0.375101	-0.310901	-0.41798	-0.438548	-0.430513	-0.265394	-0.189202	-0.252483	0.648428	0.658369	0.579309	0.722888	1	0.626778	0.760881	0.726379	0.621709	0.667027	0.441651	0.578307	-0.59216	-0.421413	-0.228173	-0.767035	-0.521528
geranylacetone	0.191044	0.179806	0.160503	0.0373734	0.0816564	0.00652381	0.0695041	0.0574617	0.261588	0.325333	-0.0543616	-0.0611178	-0.184915	-0.215296	-0.192618	-0.208618	-0.326339	0.166151	-0.248542	-0.247494	-0.24969	-0.243264	-0.24257	-0.350373	-0.446899	-0.368048	-0.32619	-0.473006	-0.664946	-0.337534	-0.626885	-0.640809	0.728747	0.725471	0.742287	0.896588	0.626778	1	0.669447	0.93143	0.457591	0.514275	0.136794	0.480983	-0.432911	-0.212845	0.0998056	-0.817988	-0.383971
decanal	0.225321	0.400147	0.169998	-0.104204	0.00502454	0.0832767	0.0382468	0.0514691	0.301427	0.350428	-0.0763857	-0.360479	-0.337189	-0.378663	-0.377367	-0.262453	-0.317059	-0.00847528	-0.255117	-0.257335	-0.252264	-0.261024	-0.261815	-0.320566	-0.448686	-0.243284	-0.40047	-0.31305	-0.604185	-0.292502	-0.606823	-0.461431	0.546038	0.422791	0.714147	0.779536	0.760881	0.669447	1	0.808823	0.587496	0.627125	0.2745	0.540293	-0.611151	-0.494546	-0.235697	-0.849109	-0.717231
beta-ionone	0.244613	0.254402	0.19186	0.0639474	0.135488	0.115159	0.156348	0.187954	0.425219	0.505165	-0.0709099	-0.159683	-0.303067	-0.338202	-0.315722	-0.295178	-0.350294	-0.0481633	-0.39102	-0.389555	-0.387995	-0.390793	-0.386912	-0.474219	-0.58456	-0.448852	-0.531948	-0.595821	-0.731049	-0.322023	-0.634426	-0.433164	0.78336	0.689912	0.699671	0.977949	0.726379	0.93143	0.808823	1	0.671908	0.740973	0.418431	0.720167	-0.700201	-0.506586	-0.229859	-0.917006	-0.653925
(E)-2-pentenal	0.615362	0.59425	0.490309	0.535127	0.570903	0.63956	0.658874	0.677045	0.885588	0.903833	0.38058	0.203321	0.0639276	0.0435199	0.0611734	0.0673851	0.0854049	-0.0489971	-0.158469	-0.158082	-0.15539	-0.166692	-0.151374	-0.20956	-0.31168	-0.254462	-0.446381	-0.388727	-0.400491	0.110474	-0.27179	0.0735238	0.816561	0.546174	0.400557	0.77335	0.621709	0.457591	0.587496	0.671908	1	0.96139	0.78878	0.860835	-0.756958	-0.733217	-0.622983	-0.739392	-0.877203
1-penten-3-one	0.473427	0.457853	0.376121	0.407751	0.446607	0.512188	0.545507	0.599362	0.830233	0.860964	0.198008	0.0561144	-0.114752	-0.139377	-0.110908	-0.109227	-0.100529	-0.163737	-0.351456	-0.354311	-0.350252	-0.341638	-0.338039	-0.396928	-0.476331	-0.415752	-0.606761	-0.517568	-0.483394	0.0108516	-0.295714	0.117503	0.808241	0.55392	0.428463	0.818329	0.667027	0.514275	0.627125	0.740973	0.96139	1	0.840692	0.935768	-0.873699	-0.820706	-0.691069	-0.752114	-0.868944
ethyl propanoate	0.313459	0.252824	0.250372	0.3969	0.388623	0.48912	0.501094	0.615397	0.723147	0.780562	0.0934727	0.0573916	-0.163402	-0.167916	-0.154599	-0.210148	0.00944574	-0.382824	-0.453424	-0.449775	-0.438466	-0.452543	-0.45131	-0.450809	-0.464394	-0.426242	-0.68212	-0.560631	-0.291245	0.0126335	0.0638998	0.581218	0.554238	0.282137	-0.0486244	0.487307	0.441651	0.136794	0.2745	0.418431	0.78878	0.840692	1	0.905335	-0.859805	-0.819945	-0.914624	-0.438252	-0.706434
ethyl 2-methylbutanoate	0.294128	0.248224	0.265892	0.284245	0.294223	0.358024	0.40306	0.4893	0.70094	0.782979	-0.00748997	-0.0583913	-0.287025	-0.302882	-0.289269	-0.339091	-0.203505	-0.346012	-0.532281	-0.532232	-0.524618	-0.53137	-0.528598	-0.56835	-0.634052	-0.559236	-0.76116	-0.685388	-0.572557	-0.19192	-0.240125	0.24107	0.714272	0.492914	0.266927	0.765179	0.578307	0.480983	0.540293	0.720167	0.860835	0.935768	0.905335	1	-0.948084	-0.841081	-0.79976	-0.708668	-0.792705
methyl hexanoate	-0.0860352	-0.0965007	-0.0378702	-0.0283428	-0.0774325	-0.162695	-0.175863	-0.303906	-0.515878	-0.603313	0.224774	0.325718	0.523526	0.539632	0.524298	0.514774	0.34913	0.505538	0.692139	0.693604	0.686574	0.684049	0.683184	0.707611	0.766207	0.609917	0.872288	0.716743	0.629023	0.226795	0.247078	-0.276923	-0.561347	-0.353015	-0.261169	-0.70389	-0.59216	-0.432911	-0.611151	-0.700201	-0.756958	-0.873699	-0.859805	-0.948084	1	0.852801	0.826427	0.677797	0.766814
1-hexanol	-0.192394	-0.200356	-0.223318	-0.180483	-0.262112	-0.332294	-0.337451	-0.468464	-0.635406	-0.664385	0.0266386	0.163741	0.332103	0.370207	0.32145	0.241865	0.379856	0.457795	0.505077	0.512399	0.508843	0.501031	0.496834	0.484239	0.507846	0.47095	0.6673	0.529811	0.340221	0.0561366	0.182972	-0.385707	-0.427544	-0.121264	-0.211556	-0.539771	-0.421413	-0.212845	-0.494546	-0.506586	-0.733217	-0.820706	-0.819945	-0.841081	0.852801	1	0.837562	0.439737	0.780906
pseudocumene	-0.123961	-0.104796	-0.0959281	-0.163556	-0.170556	-0.315003	-0.29619	-0.422186	-0.509442	-0.583771	0.075945	0.174804	0.339215	0.335314	0.339019	0.345321	0.0944809	0.590625	0.51392	0.508946	0.496502	0.511273	0.511433	0.471915	0.487433	0.397515	0.695472	0.454038	0.245552	0.00933523	-0.0657999	-0.68761	-0.268739	0.0203976	0.184663	-0.275054	-0.228173	0.0998056	-0.235697	-0.229859	-0.622983	-0.691069	-0.914624	-0.79976	0.826427	0.837562	1	0.265471	0.66921
valencene	-0.386003	-0.441383	-0.301854	-0.166696	-0.207732	-0.245755	-0.254251	-0.254752	-0.480263	-0.565552	-0.0558242	0.084513	0.171587	0.202572	0.208325	0.217885	0.122148	-0.0444254	0.236729	0.24001	0.238566	0.251669	0.256168	0.368649	0.500011	0.29488	0.462953	0.476932	0.751646	0.287761	0.537966	0.411591	-0.813093	-0.719732	-0.660867	-0.93351	-0.767035	-0.817988	-0.849109	-0.917006	-0.739392	-0.752114	-0.438252	-0.708668	0.677797	0.439737	0.265471	1	0.713751
ethyl hexanoate	-0.56521	-0.586354	-0.432857	-0.328709	-0.411998	-0.538527	-0.506626	-0.52298	-0.698217	-0.757868	-0.260488	0.0313203	0.09776	0.128896	0.126656	0.0284838	-0.000416477	0.208568	0.156347	0.157884	0.150309	0.155329	0.155779	0.172436	0.298247	0.13638	0.410504	0.275506	0.36354	-0.0107077	0.511013	-0.0260486	-0.663051	-0.315801	-0.404284	-0.724304	-0.521528	-0.383971	-0.717231	-0.653925	-0.877203	-0.868944	-0.706434	-0.792705	0.766814	0.780906	0.66921	0.713751	1
undecanal	-0.0462136	0.176997	-0.241995	-0.389065	-0.354256	-0.219546	-0.313476	-0.333389	-0.175505	-0.126763	-0.201725	-0.519589	-0.34687	-0.336765	-0.379724	-0.314763	-0.134635	0.0726418	-0.126701	-0.125255	-0.108597	-0.130529	-0.13612	-0.188291	-0.295514	-0.023037	-0.184161	-0.00183673	-0.420674	-0.169861	-0.40123	-0.437954	0.194059	0.182019	0.452206	0.334733	0.408028	0.348369	0.68325	0.388983	0.144805	0.169392	-0.100836	0.0717145	-0.217129	0.0127521	0.0584347	-0.488585	-0.299656
eucalyptol	-0.0522604	0.0294859	-0.0505519	-0.307446	-0.262794	-0.269398	-0.23779	-0.257359	-0.00795806	0.0530064	-0.317953	-0.406141	-0.428351	-0.455927	-0.45154	-0.434768	-0.500913	0.128841	-0.355533	-0.361216	-0.357731	-0.340152	-0.364448	-0.45564	-0.546111	-0.412227	-0.381315	-0.400787	-0.735654	-0.423801	-0.662272	-0.655526	0.476914	0.48665	0.67912	0.74943	0.562253	0.858222	0.764761	0.809491	0.272293	0.369315	-0.0147641	0.346509	-0.395901	-0.165368	0.115172	-0.748966	-0.327699
(E)-2-hexenal	0.0121462	0.0179356	-0.0335511	-0.14243	-0.10345	-0.12728	-0.0425744	-0.0394999	0.307323	0.342596	-0.278232	-0.327347	-0.45554	-0.473419	-0.455123	-0.452352	-0.522057	-0.143305	-0.531011	-0.534373	-0.542199	-0.514723	-0.501157	-0.593332	-0.704139	-0.579595	-0.617706	-0.611735	-0.785163	-0.288329	-0.54975	-0.393466	0.629211	0.632139	0.664507	0.86298	0.610103	0.842886	0.714906	0.884267	0.583695	0.677762	0.321998	0.655909	-0.669028	-0.447532	-0.19384	-0.790668	-0.497456
ethyl acetate	-0.337801	-0.39131	-0.277597	-0.0533327	-0.0843984	-0.046372	-0.0181343	0.180192	0.202745	0.212217	-0.367197	-0.225452	-0.431657	-0.414806	-0.385484	-0.454636	-0.245501	-0.563179	-0.701594	-0.7015	-0.695198	-0.688807	-0.689319	-0.65171	-0.548382	-0.593234	-0.726143	-0.5726	-0.154267	0.029093	0.479346	0.863067	-0.0415942	-0.126992	-0.447536	-0.0597735	0.0586516	-0.263967	-0.202451	-0.064328	0.212889	0.346903	0.701896	0.504645	-0.570295	-0.53664	-0.741675	0.118788	-0.0916462
beta-citronellol	-0.650039	-0.609528	-0.503223	-0.387653	-0.357029	-0.348482	-0.362598	-0.122703	-0.167396	-0.165282	-0.546146	-0.467939	-0.580394	-0.560356	-0.530016	-0.512842	-0.340403	-0.574764	-0.70362	-0.707735	-0.69841	-0.709236	-0.704092	-0.646507	-0.526618	-0.558039	-0.628232	-0.453883	-0.144234	0.00449387	0.511411	0.774537	-0.418847	-0.449192	-0.501876	-0.329292	-0.131745	-0.439094	-0.24226	-0.278873	-0.0960741	0.0228917	0.367457	0.183469	-0.339076	-0.321115	-0.533062	0.305695	0.142951
carvone	-0.432807	-0.44031	-0.366449	-0.282362	-0.230623	-0.212314	-0.191346	0.0400156	0.143633	0.191319	-0.544313	-0.507638	-0.723437	-0.714647	-0.680866	-0.661804	-0.50578	-0.664574	-0.913238	-0.910322	-0.901678	-0.901518	-0.889453	-0.864074	-0.815918	-0.781808	-0.922629	-0.753476	-0.451186	-0.120722	0.134561	0.604784	0.0631213	-0.0460464	-0.144761	0.232299	0.247738	0.062178	0.158142	0.279825	0.326734	0.495471	0.691835	0.649775	-0.777846	-0.668093	-0.750789	-0.164196	-0.283203
linalool	-0.471816	-0.447252	-0.428457	-0.403166	-0.353166	-0.303372	-0.292977	-0.0816939	0.0732284	0.124993	-0.639296	-0.64749	-0.813499	-0.812204	-0.78729	-0.752378	-0.586468	-0.69283	-0.93547	-0.940997	-0.933945	-0.932653	-0.923554	-0.902337	-0.881051	-0.764503	-0.952531	-0.774385	-0.557382	-0.205394	0.0269264	0.53292	0.0421634	-0.0516944	-0.0924662	0.264288	0.25472	0.0824776	0.270741	0.316905	0.319662	0.486991	0.639445	0.639463	-0.794575	-0.673292	-0.731311	-0.238176	-0.338724
(E)-carveol	-0.491125	-0.461475	-0.403599	-0.314405	-0.255891	-0.223702	-0.228077	0.010146	0.0617839	0.0855098	-0.513851	-0.509565	-0.672635	-0.655559	-0.625013	-0.577831	-0.417105	-0.647575	-0.829097	-0.824222	-0.814274	-0.821306	-0.806046	-0.764567	-0.691145	-0.67987	-0.814496	-0.591093	-0.297741	0.014279	0.285444	0.70777	-0.134305	-0.249542	-0.284957	0.00409936	0.110702	-0.177539	0.0388743	0.047778	0.207683	0.353183	0.604061	0.489009	-0.640264	-0.586509	-0.73026	0.0285691	-0.175793
(Z)-carveol	-0.589445	-0.557792	-0.44391	-0.443601	-0.36885	-0.383214	-0.367355	-0.133753	-0.0185882	-0.026242	-0.660789	-0.593334	-0.745627	-0.746917	-0.707022	-0.629971	-0.566257	-0.574319	-0.888597	-0.890166	-0.880773	-0.879051	-0.866439	-0.841961	-0.76035	-0.778344	-0.821442	-0.703773	-0.40812	-0.0563192	0.200164	0.519073	-0.117813	-0.150054	-0.184724	0.104004	0.221059	-0.00492077	0.123893	0.167521	0.142611	0.306312	0.469647	0.427911	-0.588354	-0.498777	-0.530581	-0.0523657	-0.0988198
ethanol	-0.335172	-0.318736	-0.318002	-0.262546	-0.263447	-0.247489	-0.198523	-0.0380454	0.126162	0.234263	-0.546143	-0.482865	-0.700018	-0.697983	-0.676372	-0.778198	-0.512632	-0.503871	-0.877723	-0.871266	-0.862309	-0.865426	-0.888846	-0.896959	-0.912579	-0.790337	-0.930707	-0.830172	-0.752743	-0.464891	-0.129299	0.219059	0.342457	0.321286	0.0885467	0.523837	0.456104	0.451589	0.393215	0.589189	0.388316	0.56261	0.609272	0.731174	-0.815553	-0.534425	-0.582546	-0.512431	-0.331112
3-methylfuran	-0.389589	-0.302289	-0.334877	-0.341543	-0.248667	-0.262219	-0.233691	-0.0400819	0.185433	0.170682	-0.539869	-0.562193	-0.701741	-0.727939	-0.661178	-0.583868	-0.705991	-0.44091	-0.847595	-0.855311	-0.855076	-0.839331	-0.825539	-0.834761	-0.805187	-0.753454	-0.841321	-0.755544	-0.549692	-0.176445	-0.0391277	0.231773	0.189119	0.159538	0.24312	0.439808	0.531156	0.335156	0.473758	0.505298	0.375307	0.55091	0.50105	0.582715	-0.724938	-0.674901	-0.482407	-0.3574	-0.324647
(Z)-limonene oxide	-0.563992	-0.598541	-0.540052	-0.533312	-0.442081	-0.493834	-0.45457	-0.272074	-0.0847548	-0.112541	-0.683832	-0.653269	-0.775744	-0.779624	-0.737814	-0.633926	-0.66035	-0.581294	-0.846485	-0.852201	-0.853475	-0.843172	-0.805093	-0.778806	-0.768212	-0.691285	-0.764009	-0.746113	-0.454798	-0.124253	-0.0929349	0.28939	-0.0673384	0.00154038	-0.028837	0.23124	0.214206	0.160546	0.186266	0.297802	0.143085	0.289434	0.333547	0.378596	-0.531596	-0.422847	-0.356042	-0.128144	-0.143606
(E)-limonene oxide	-0.510524	-0.451038	-0.525325	-0.538943	-0.463009	-0.420435	-0.44606	-0.246491	-0.0738583	-0.0470816	-0.691446	-0.744393	-0.85071	-0.853059	-0.831028	-0.730648	-0.683262	-0.579065	-0.878894	-0.877839	-0.870801	-0.88613	-0.846419	-0.828286	-0.829476	-0.661297	-0.84521	-0.714598	-0.509986	-0.199403	-0.080573	0.310333	0.0252626	-0.0123618	0.0756044	0.307455	0.356968	0.224224	0.383647	0.401355	0.216719	0.371927	0.44339	0.483091	-0.674937	-0.560031	-0.500384	-0.254372	-0.268856
acetaldehyde	-0.563741	-0.505885	-0.510347	-0.515001	-0.451893	-0.459184	-0.414439	-0.240934	-0.0300609	0.0093738	-0.710349	-0.683583	-0.835436	-0.842119	-0.802404	-0.769093	-0.695684	-0.539289	-0.939373	-0.943334	-0.933955	-0.931445	-0.918575	-0.913735	-0.896833	-0.82987	-0.888209	-0.790605	-0.621577	-0.300592	-0.075414	0.224863	0.0696615	0.0998433	0.116356	0.352638	0.369547	0.313979	0.36559	0.449852	0.232389	0.411297	0.424605	0.529066	-0.691092	-0.494448	-0.45164	-0.304925	-0.189206
dodecanal	-0.516285	-0.411885	-0.453339	-0.594926	-0.49209	-0.503149	-0.484199	-0.319256	-0.0884413	-0.0314479	-0.720676	-0.781379	-0.887229	-0.908101	-0.871021	-0.795895	-0.78176	-0.494129	-0.891837	-0.895169	-0.893324	-0.892261	-0.891547	-0.901641	-0.933126	-0.756981	-0.860328	-0.775128	-0.799944	-0.430075	-0.339263	-0.0380895	0.134281	0.142178	0.297338	0.511684	0.46018	0.491649	0.616149	0.621454	0.25602	0.427124	0.311662	0.523432	-0.700929	-0.510881	-0.360888	-0.50685	-0.321088
methyl octanoate	-0.675156	-0.573815	-0.623152	-0.767846	-0.759349	-0.825413	-0.84237	-0.883279	-0.896276	-0.924287	-0.54786	-0.500205	-0.307915	-0.297609	-0.312566	-0.260989	-0.357561	0.0821904	-0.00840336	-0.00514557	-0.0129099	-0.0202249	-0.0171166	0.0113837	0.0257312	0.100593	0.264901	0.192368	-0.0119932	-0.214817	-0.0825584	-0.441745	-0.636476	-0.324643	-0.0588144	-0.415322	-0.335774	-0.0688334	-0.130781	-0.280351	-0.798189	-0.773249	-0.854708	-0.742312	0.596832	0.65028	0.718969	0.357942	0.673891
(Z)-3-hexen-1-ol	-0.65652	-0.616549	-0.609489	-0.710783	-0.719398	-0.832254	-0.810064	-0.832102	-0.806156	-0.831775	-0.575662	-0.4454	-0.330357	-0.318795	-0.326426	-0.318572	-0.432049	0.119051	-0.115421	-0.118321	-0.129133	-0.113165	-0.106031	-0.136275	-0.120766	-0.0759758	0.136898	0.0162251	-0.169957	-0.245278	-0.133827	-0.515267	-0.408989	-0.0600247	0.103975	-0.20253	-0.211154	0.178227	-0.106827	-0.0789581	-0.696999	-0.633158	-0.781601	-0.598796	0.482682	0.635488	0.748199	0.198861	0.672276
geranial	-0.677424	-0.58335	-0.632223	-0.849547	-0.806863	-0.860568	-0.881582	-0.893048	-0.858947	-0.863937	-0.632361	-0.648778	-0.48546	-0.475416	-0.494031	-0.391693	-0.500584	-0.0539024	-0.158308	-0.160389	-0.166762	-0.148698	-0.144375	-0.138106	-0.156382	-0.0326378	0.0937067	0.101973	-0.169815	-0.249837	-0.279697	-0.486142	-0.514394	-0.270873	0.134454	-0.221954	-0.250777	0.0881269	0.044252	-0.0883829	-0.670069	-0.597722	-0.757802	-0.565984	0.383889	0.490076	0.594836	0.188676	0.486816
nerol	-0.71789	-0.633335	-0.702891	-0.717148	-0.684239	-0.692085	-0.760835	-0.690129	-0.828253	-0.853635	-0.554712	-0.530305	-0.393823	-0.384658	-0.374307	-0.254482	-0.318604	-0.128451	-0.161006	-0.16666	-0.165802	-0.15307	-0.15666	-0.113775	-0.0293756	0.0621857	0.104217	0.180246	0.12351	0.0597321	0.12059	0.0388639	-0.694793	-0.605171	-0.248719	-0.552822	-0.456786	-0.307517	-0.315895	-0.437116	-0.756538	-0.690983	-0.58226	-0.649547	0.435131	0.442601	0.410078	0.534137	0.607237
methyl nonanoate	-0.828085	-0.76243	-0.739127	-0.814711	-0.827114	-0.87607	-0.891682	-0.870925	-0.906017	-0.951011	-0.667156	-0.566359	-0.412174	-0.384273	-0.403279	-0.360632	-0.361901	-0.105423	-0.171812	-0.175551	-0.179639	-0.179708	-0.164843	-0.133992	-0.0762358	-0.0218344	0.101621	0.109845	0.0351655	-0.0901905	0.175573	-0.0728216	-0.782726	-0.477816	-0.295919	-0.599437	-0.477105	-0.333032	-0.346959	-0.48797	-0.824717	-0.773548	-0.701224	-0.693012	0.520744	0.578233	0.510294	0.539908	0.744953
hexyl acetate	-0.85223	-0.740757	-0.694881	-0.778407	-0.737307	-0.822759	-0.842188	-0.763689	-0.848038	-0.895388	-0.627178	-0.534332	-0.40524	-0.400497	-0.385322	-0.321632	-0.377302	-0.0979256	-0.209604	-0.22309	-0.226414	-0.21765	-0.225576	-0.168623	-0.0754893	-0.110153	0.0742664	0.0398672	0.0569775	-0.202925	0.236292	-0.0383089	-0.810943	-0.534279	-0.278368	-0.616255	-0.372985	-0.355245	-0.309352	-0.487548	-0.80975	-0.74417	-0.654449	-0.667452	0.479581	0.508851	0.474849	0.534023	0.730318
neryl acetate	-0.838428	-0.783248	-0.747284	-0.761644	-0.756442	-0.807794	-0.834539	-0.782187	-0.887107	-0.937741	-0.610086	-0.505908	-0.376649	-0.345383	-0.353534	-0.297111	-0.310349	-0.157951	-0.166663	-0.165331	-0.168256	-0.162817	-0.149429	-0.0709701	0.0212509	-0.0088029	0.138608	0.167614	0.254083	-0.046035	0.303519	0.0938162	-0.882956	-0.625852	-0.417642	-0.739914	-0.525767	-0.485214	-0.478735	-0.618917	-0.877636	-0.813929	-0.637586	-0.721692	0.538594	0.535133	0.426828	0.720696	0.786453
heptyl acetate	-0.851503	-0.771336	-0.768912	-0.888791	-0.863547	-0.953944	-0.943517	-0.911135	-0.885137	-0.890582	-0.755575	-0.66706	-0.564184	-0.550182	-0.551517	-0.509962	-0.549985	-0.121034	-0.331711	-0.331681	-0.338349	-0.331143	-0.329416	-0.308491	-0.284531	-0.211262	-0.0500562	-0.0884825	-0.228216	-0.314686	-0.0946382	-0.329565	-0.582244	-0.270116	-0.0380366	-0.293804	-0.254236	0.0393061	-0.0861593	-0.139717	-0.71266	-0.619686	-0.680258	-0.532509	0.348666	0.500154	0.544168	0.261692	0.626371
geraniol	-0.876364	-0.792076	-0.830567	-0.918539	-0.916495	-0.938934	-0.956843	-0.915945	-0.898984	-0.913485	-0.801105	-0.729075	-0.603586	-0.583257	-0.60008	-0.556519	-0.491189	-0.240116	-0.359398	-0.366562	-0.367106	-0.34948	-0.35241	-0.314283	-0.272279	-0.177561	-0.0911726	-0.0432747	-0.115113	-0.258512	0.0543875	-0.0981598	-0.679272	-0.395382	-0.195595	-0.435909	-0.306664	-0.181178	-0.171889	-0.299793	-0.735997	-0.631498	-0.58157	-0.529803	0.30866	0.463559	0.397963	0.374407	0.611816
1-nonanol	-0.741009	-0.614525	-0.764945	-0.920231	-0.853369	-0.874878	-0.918499	-0.877652	-0.820612	-0.801999	-0.741907	-0.79723	-0.665449	-0.650388	-0.669384	-0.559047	-0.508815	-0.171557	-0.374143	-0.367427	-0.368108	-0.37432	-0.365477	-0.346265	-0.365121	-0.177236	-0.145424	-0.101184	-0.3119	-0.261873	-0.236229	-0.36629	-0.454647	-0.23229	0.0752458	-0.120994	-0.0510377	0.142835	0.17817	0.0387579	-0.53288	-0.448944	-0.549039	-0.401025	0.163639	0.373073	0.411919	0.0539906	0.367081
methyl decanoate	-0.893648	-0.805299	-0.827187	-0.957514	-0.927241	-0.973063	-0.974658	-0.902255	-0.817857	-0.809356	-0.888992	-0.828227	-0.754276	-0.740553	-0.746964	-0.688869	-0.673128	-0.28336	-0.540027	-0.541388	-0.544412	-0.541049	-0.531985	-0.518417	-0.497728	-0.364215	-0.293292	-0.267612	-0.366782	-0.329499	-0.100987	-0.190182	-0.515335	-0.247151	-0.0369306	-0.178853	-0.138086	0.0725991	0.0433539	-0.0232243	-0.57267	-0.44425	-0.46963	-0.329125	0.107368	0.283763	0.317292	0.146743	0.463909
nonyl acetate	-0.964395	-0.900672	-0.829754	-0.8508	-0.820126	-0.917305	-0.901915	-0.794116	-0.82121	-0.840677	-0.806585	-0.651866	-0.615915	-0.60074	-0.576435	-0.537532	-0.5733	-0.280566	-0.484549	-0.486365	-0.491019	-0.483697	-0.478753	-0.434009	-0.341157	-0.323089	-0.187862	-0.194083	-0.129887	-0.209907	0.182669	0.0334006	-0.699093	-0.429503	-0.258398	-0.447642	-0.327979	-0.17384	-0.274399	-0.295758	-0.717259	-0.593321	-0.489452	-0.466814	0.264888	0.35144	0.33419	0.448426	0.683926
ethyl octanoate	-0.979294	-0.892155	-0.851629	-0.866218	-0.857519	-0.904081	-0.908337	-0.774511	-0.775195	-0.779262	-0.872028	-0.731836	-0.711734	-0.688903	-0.680871	-0.666081	-0.603504	-0.367583	-0.600225	-0.597623	-0.59837	-0.599265	-0.593383	-0.540709	-0.450588	-0.413954	-0.336365	-0.274672	-0.173599	-0.273085	0.25646	0.162206	-0.661362	-0.418709	-0.303435	-0.419268	-0.224946	-0.200675	-0.20833	-0.26533	-0.639316	-0.494022	-0.326763	-0.329593	0.110141	0.223562	0.149272	0.397862	0.598818
(E)-2-hexen-1-ol	-0.504092	-0.445459	-0.471059	-0.643826	-0.577427	-0.672984	-0.621952	-0.573095	-0.375226	-0.313569	-0.648241	-0.629882	-0.671695	-0.68239	-0.667733	-0.638154	-0.693374	-0.159802	-0.567121	-0.567069	-0.574406	-0.56615	-0.563197	-0.612273	-0.67658	-0.527968	-0.45293	-0.52942	-0.742678	-0.509965	-0.523122	-0.563453	0.118444	0.301374	0.476685	0.483857	0.305737	0.711949	0.498287	0.619031	-0.0576521	0.0669726	-0.214446	0.132913	-0.254898	0.0151659	0.238977	-0.46655	0.0223407
1-decanol	-0.559159	-0.412985	-0.540731	-0.81578	-0.716128	-0.723696	-0.751761	-0.691357	-0.522763	-0.46359	-0.718076	-0.835158	-0.773725	-0.782713	-0.791868	-0.670098	-0.667629	-0.215475	-0.53351	-0.533461	-0.531231	-0.532597	-0.529818	-0.550694	-0.616115	-0.396628	-0.407597	-0.351588	-0.629345	-0.434442	-0.509128	-0.486038	-0.087216	0.0300706	0.400125	0.319919	0.271636	0.492486	0.583239	0.46698	-0.153173	-0.0345703	-0.267942	0.0142728	-0.225609	0.00970666	0.173236	-0.376143	-0.03142
3-carene	-0.710316	-0.610367	-0.652997	-0.806037	-0.735849	-0.828156	-0.807266	-0.723127	-0.584578	-0.558062	-0.779003	-0.738573	-0.727585	-0.738333	-0.716808	-0.659061	-0.729021	-0.170032	-0.583397	-0.58524	-0.5921	-0.587968	-0.582252	-0.606392	-0.625444	-0.473057	-0.400455	-0.457723	-0.611959	-0.454943	-0.335945	-0.434908	-0.153339	0.0886911	0.303725	0.219284	0.198667	0.482602	0.346831	0.377282	-0.295185	-0.162509	-0.350582	-0.0879464	-0.0947304	0.139133	0.321922	-0.231453	0.239563
1-octanol	-0.80097	-0.680643	-0.752803	-0.921686	-0.856474	-0.898078	-0.901611	-0.81247	-0.675853	-0.641434	-0.867521	-0.871786	-0.827419	-0.822705	-0.823553	-0.752355	-0.70355	-0.298717	-0.634215	-0.632169	-0.634034	-0.636296	-0.632273	-0.631097	-0.649128	-0.468978	-0.442798	-0.405448	-0.573582	-0.417426	-0.265419	-0.296703	-0.306328	-0.0839494	0.140139	0.0797077	0.102137	0.29424	0.307988	0.239815	-0.348142	-0.214458	-0.326572	-0.115975	-0.109698	0.135527	0.209606	-0.132846	0.236995
ethyl nonanoate	-0.829752	-0.794443	-0.719936	-0.635958	-0.678385	-0.677788	-0.700772	-0.584674	-0.669502	-0.710736	-0.648409	-0.489909	-0.445174	-0.404475	-0.415795	-0.425908	-0.279478	-0.350193	-0.376888	-0.380818	-0.37848	-0.373385	-0.365809	-0.314136	-0.182999	-0.201899	-0.1632	-0.0393053	0.139945	0.0299248	0.583813	0.49695	-0.778558	-0.585442	-0.600121	-0.715634	-0.463593	-0.613007	-0.538239	-0.639302	-0.664255	-0.571171	-0.250708	-0.428381	0.251956	0.28002	0.0440186	0.669758	0.664593
(Z)-carvyl acetate	-0.879249	-0.894636	-0.773786	-0.649659	-0.678772	-0.731674	-0.725078	-0.602873	-0.720367	-0.742522	-0.677114	-0.468452	-0.469489	-0.437244	-0.42211	-0.43383	-0.394349	-0.384078	-0.421775	-0.416997	-0.417613	-0.410949	-0.411439	-0.331705	-0.198722	-0.247253	-0.147327	-0.0939473	0.12837	-0.023925	0.425016	0.417863	-0.759936	-0.582069	-0.588713	-0.659709	-0.550463	-0.476016	-0.598911	-0.553065	-0.725946	-0.612132	-0.306215	-0.447515	0.288346	0.286298	0.125461	0.706681	0.713267
(E)-carvyl acetate	-0.79233	-0.781339	-0.68697	-0.576809	-0.583369	-0.571631	-0.601373	-0.425932	-0.558971	-0.54747	-0.651279	-0.511146	-0.543457	-0.516365	-0.505268	-0.478903	-0.362714	-0.527029	-0.516778	-0.524423	-0.519282	-0.507919	-0.509783	-0.439564	-0.300849	-0.298795	-0.319446	-0.170072	0.0774755	0.0113982	0.476338	0.637615	-0.67133	-0.647807	-0.561596	-0.590741	-0.480117	-0.534382	-0.494993	-0.504385	-0.533511	-0.405064	-0.0370562	-0.22777	0.0394787	0.0242453	-0.176542	0.603465	0.476338
citronellyl acetate	-0.794506	-0.795538	-0.678718	-0.561505	-0.553375	-0.559893	-0.571833	-0.392826	-0.477748	-0.504504	-0.636698	-0.507973	-0.548737	-0.518639	-0.501046	-0.474432	-0.359384	-0.546253	-0.562208	-0.560235	-0.556094	-0.553661	-0.546782	-0.438521	-0.30966	-0.36485	-0.362698	-0.230861	0.126719	0.0111059	0.498534	0.693548	-0.707071	-0.63714	-0.654372	-0.603745	-0.398681	-0.596072	-0.485636	-0.525294	-0.464175	-0.345297	0.040637	-0.174511	0.000265309	-0.0317907	-0.252226	0.631758	0.432476
geranyl acetate	-0.938513	-0.883453	-0.801842	-0.784389	-0.76121	-0.780324	-0.791785	-0.627377	-0.670671	-0.676147	-0.807689	-0.696347	-0.701449	-0.674899	-0.662444	-0.619643	-0.520392	-0.519545	-0.625334	-0.62663	-0.623296	-0.612302	-0.613814	-0.537144	-0.424973	-0.421035	-0.384445	-0.241865	-0.0630322	-0.125659	0.346521	0.433382	-0.725021	-0.592494	-0.468288	-0.52247	-0.352071	-0.415948	-0.32565	-0.40259	-0.568754	-0.421065	-0.156061	-0.25154	0.0270985	0.0818488	-0.0774947	0.513951	0.500723
alpha-terpinene	-0.6711	-0.722103	-0.711068	-0.611746	-0.684732	-0.648173	-0.593554	-0.531176	-0.376542	-0.320954	-0.775825	-0.637288	-0.726173	-0.684523	-0.707861	-0.793033	-0.558577	-0.582637	-0.729054	-0.723551	-0.723864	-0.708173	-0.694759	-0.692964	-0.667305	-0.567151	-0.61491	-0.471678	-0.371486	-0.222246	0.052602	0.287945	-0.201397	-0.0688227	-0.236729	-0.0350604	-0.164947	0.0128757	-0.0945767	0.0502873	-0.174367	-0.0096475	0.140917	0.181939	-0.319515	-0.108112	-0.258927	0.0999742	0.184482
neral	-0.79754	-0.768078	-0.652495	-0.622433	-0.554529	-0.624741	-0.591366	-0.359413	-0.276131	-0.283107	-0.785861	-0.667397	-0.808223	-0.800126	-0.753532	-0.707111	-0.673209	-0.535364	-0.903358	-0.907095	-0.904667	-0.888671	-0.876923	-0.855645	-0.766389	-0.783426	-0.755892	-0.672651	-0.412608	-0.177159	0.199015	0.380727	-0.263047	-0.170207	-0.150838	-0.00822871	0.111355	0.0240771	0.00758756	0.0951548	-0.10613	0.0823499	0.217785	0.224678	-0.413506	-0.272195	-0.293274	0.0632308	0.166678
alpha-terpineol	-0.731659	-0.683488	-0.664723	-0.710806	-0.651205	-0.621847	-0.614071	-0.430774	-0.275259	-0.243314	-0.837326	-0.840616	-0.93101	-0.919411	-0.906336	-0.834605	-0.702473	-0.685075	-0.922807	-0.92892	-0.923021	-0.910096	-0.89781	-0.856153	-0.828732	-0.725065	-0.820903	-0.637075	-0.474674	-0.248569	0.00453911	0.387689	-0.251472	-0.237144	-0.125507	0.0525505	0.0799053	-0.00598999	0.177977	0.149761	-0.00424957	0.176526	0.302034	0.334347	-0.55177	-0.41038	-0.469891	-0.0337716	-0.0723937
limonene	-0.771351	-0.732513	-0.696195	-0.736222	-0.668438	-0.680294	-0.660583	-0.472753	-0.319922	-0.291128	-0.863378	-0.831136	-0.941344	-0.928776	-0.907788	-0.839145	-0.762837	-0.637884	-0.939852	-0.938965	-0.935665	-0.924816	-0.902994	-0.868099	-0.840004	-0.750565	-0.805861	-0.662944	-0.485219	-0.277303	-0.0288102	0.282344	-0.228801	-0.162378	-0.0506856	0.0991219	0.128294	0.110488	0.184909	0.218501	-0.0516501	0.141952	0.232652	0.301109	-0.515971	-0.355499	-0.365952	-0.0444213	0.00471877
terpinolene	-0.808811	-0.800262	-0.749083	-0.732456	-0.697183	-0.706223	-0.678193	-0.50579	-0.382885	-0.346933	-0.873091	-0.79251	-0.909587	-0.884977	-0.875164	-0.847848	-0.704041	-0.655988	-0.916578	-0.910261	-0.912405	-0.896902	-0.883598	-0.838609	-0.795021	-0.722833	-0.76438	-0.61437	-0.425803	-0.258235	0.0650721	0.34911	-0.302369	-0.217517	-0.196833	-0.011509	0.0164199	0.0188636	0.0386043	0.106916	-0.142798	0.0475376	0.204878	0.234299	-0.442297	-0.271674	-0.352028	0.064638	0.111131
perillaldehyde	-0.855202	-0.808404	-0.699503	-0.711744	-0.641758	-0.713121	-0.678554	-0.457509	-0.362507	-0.343777	-0.853012	-0.752336	-0.874749	-0.86868	-0.827204	-0.787211	-0.73788	-0.581336	-0.922302	-0.923533	-0.923033	-0.923527	-0.912948	-0.880491	-0.815459	-0.78056	-0.767802	-0.702237	-0.510248	-0.29932	0.0999502	0.302082	-0.312146	-0.19317	-0.154849	-0.000929696	0.0630507	0.0490207	0.0643298	0.123091	-0.143069	0.0359167	0.155727	0.208935	-0.40256	-0.260797	-0.273534	0.0260416	0.158017
alpha-pinene	-0.841491	-0.774368	-0.75779	-0.804997	-0.747541	-0.750259	-0.73915	-0.557565	-0.426101	-0.395388	-0.907079	-0.874654	-0.94895	-0.936583	-0.916894	-0.858459	-0.759109	-0.625974	-0.916589	-0.914666	-0.910498	-0.901425	-0.89647	-0.853055	-0.815013	-0.713547	-0.759109	-0.600578	-0.488863	-0.292631	-0.00933365	0.267732	-0.321332	-0.24159	-0.125292	0.00814925	0.0540016	0.0450012	0.148585	0.136336	-0.155253	0.0370102	0.137544	0.198471	-0.429509	-0.267757	-0.302813	0.0142868	0.0843024
terpinen-4-ol	-0.704414	-0.695706	-0.646085	-0.61489	-0.580135	-0.540714	-0.533516	-0.341173	-0.244282	-0.20116	-0.781452	-0.745552	-0.871966	-0.849071	-0.835705	-0.790925	-0.630791	-0.741699	-0.908075	-0.904267	-0.896331	-0.886776	-0.87795	-0.826628	-0.774855	-0.688221	-0.805408	-0.580971	-0.375999	-0.132083	0.10697	0.544647	-0.264798	-0.306147	-0.268592	-0.0253346	-0.0402272	-0.0974387	0.0219463	0.060727	-0.0207247	0.163454	0.37691	0.342315	-0.54128	-0.434595	-0.55322	0.0837993	-0.0361534
gamma-terpinene	-0.731843	-0.697498	-0.682884	-0.692408	-0.655715	-0.607181	-0.601316	-0.434241	-0.313982	-0.274521	-0.82308	-0.808036	-0.902182	-0.884017	-0.87058	-0.814917	-0.697965	-0.711101	-0.888589	-0.887512	-0.881919	-0.855465	-0.856885	-0.810663	-0.765091	-0.662313	-0.763986	-0.514766	-0.3878	-0.16793	0.0312167	0.433583	-0.284178	-0.314045	-0.183043	-0.0164695	-0.0345891	-0.0533635	0.0821511	0.0798439	-0.0774038	0.122416	0.27583	0.281103	-0.502563	-0.392819	-0.470413	0.0729339	-0.0142994
styrene	-0.902177	-0.847881	-0.74852	-0.774746	-0.747785	-0.877901	-0.822847	-0.694529	-0.608197	-0.644137	-0.833141	-0.638393	-0.673307	-0.672566	-0.630227	-0.633035	-0.726866	-0.233901	-0.649976	-0.652061	-0.660434	-0.643753	-0.640078	-0.625727	-0.550527	-0.566927	-0.401491	-0.463974	-0.355095	-0.352303	0.0966759	-0.0611945	-0.415594	-0.100044	-0.0598244	-0.131443	0.0112751	0.122503	-0.0586554	0.0123277	-0.479598	-0.318771	-0.310472	-0.198664	0.0311031	0.175704	0.260818	0.166541	0.536669
linalyl acetate	-0.943165	-0.883451	-0.798738	-0.868186	-0.805569	-0.904597	-0.880371	-0.7182	-0.66238	-0.657167	-0.902661	-0.773986	-0.812539	-0.804957	-0.77569	-0.720574	-0.727835	-0.388748	-0.737071	-0.738768	-0.739445	-0.730747	-0.722758	-0.702467	-0.637069	-0.591613	-0.492928	-0.48396	-0.406945	-0.317477	0.024008	0.0112549	-0.453224	-0.225041	-0.082068	-0.12126	-0.0457975	0.0939366	-0.00765781	0.034382	-0.455662	-0.286373	-0.242784	-0.141223	-0.0738923	0.104459	0.13343	0.138795	0.430731
decyl acetate	-0.953954	-0.872394	-0.830572	-0.877155	-0.841063	-0.907722	-0.8876	-0.740342	-0.663609	-0.656452	-0.925407	-0.799248	-0.825133	-0.81581	-0.791003	-0.768976	-0.734962	-0.408914	-0.750614	-0.748978	-0.749873	-0.746659	-0.746693	-0.715398	-0.649358	-0.580399	-0.515649	-0.478136	-0.412226	-0.354549	0.0757304	0.0563439	-0.470542	-0.236772	-0.145512	-0.151741	-0.0343801	0.0485498	0.00201286	0.0058788	-0.454206	-0.28447	-0.211424	-0.129244	-0.0899459	0.081463	0.085833	0.149427	0.428139
alpha-terpinyl acetate	-0.952775	-0.883628	-0.823052	-0.878724	-0.817813	-0.893229	-0.882228	-0.708418	-0.659199	-0.644172	-0.915847	-0.808491	-0.843743	-0.831898	-0.8104	-0.761179	-0.682746	-0.444944	-0.768642	-0.768571	-0.767358	-0.767326	-0.763323	-0.727062	-0.66423	-0.602018	-0.539808	-0.507435	-0.416372	-0.332888	0.061329	0.0943467	-0.480404	-0.271848	-0.172446	-0.154027	-0.0445756	0.023624	-0.00721113	0.000590617	-0.431145	-0.269519	-0.176184	-0.10799	-0.118198	0.0783534	0.0463312	0.139993	0.390247
camphene	-0.830377	-0.713184	-0.754936	-0.824991	-0.789732	-0.761296	-0.789988	-0.639829	-0.545187	-0.530592	-0.83609	-0.856161	-0.833685	-0.804631	-0.81204	-0.745059	-0.600481	-0.50406	-0.725153	-0.715822	-0.711241	-0.725568	-0.71692	-0.711114	-0.672404	-0.51232	-0.583706	-0.355139	-0.461452	-0.0779862	0.105108	0.222842	-0.44426	-0.340006	-0.215546	-0.155759	-0.0801328	-0.114728	0.0934134	-0.0487321	-0.260564	-0.129993	-0.05086	-0.0158958	-0.222721	-0.0743818	-0.170011	0.0878774	0.198738
octyl acetate	-0.949197	-0.896705	-0.813349	-0.826817	-0.788307	-0.855624	-0.828117	-0.654189	-0.596591	-0.596526	-0.913107	-0.77019	-0.821416	-0.815193	-0.780837	-0.7558	-0.709753	-0.482775	-0.792382	-0.798132	-0.79887	-0.782868	-0.790552	-0.755274	-0.671551	-0.623731	-0.572038	-0.521887	-0.398394	-0.296654	0.129701	0.209498	-0.477987	-0.283338	-0.2304	-0.1849	-0.0890732	-0.041739	-0.0792651	-0.0507932	-0.411405	-0.233549	-0.111456	-0.0725141	-0.142764	0.0124861	-0.0194772	0.190429	0.392793
ethyl decanoate	-0.94718	-0.874244	-0.84944	-0.877974	-0.852882	-0.869746	-0.872677	-0.712221	-0.647489	-0.635252	-0.931177	-0.840235	-0.854302	-0.832408	-0.827808	-0.791073	-0.662812	-0.513151	-0.768684	-0.769997	-0.768031	-0.767699	-0.758483	-0.726147	-0.658687	-0.557495	-0.564994	-0.450283	-0.366596	-0.249718	0.1679	0.247004	-0.527808	-0.341593	-0.262194	-0.239399	-0.117585	-0.122123	-0.0585435	-0.104342	-0.422367	-0.261549	-0.109792	-0.0926842	-0.144419	0.0204796	-0.0686898	0.209927	0.37124
ethyl butanoate	-0.889147	-0.868456	-0.760426	-0.742257	-0.699899	-0.800282	-0.755901	-0.566066	-0.506684	-0.479101	-0.866758	-0.698051	-0.815443	-0.798841	-0.769012	-0.764018	-0.687199	-0.442142	-0.838912	-0.83956	-0.841706	-0.835211	-0.821276	-0.81252	-0.745207	-0.708557	-0.645651	-0.632789	-0.48118	-0.319458	0.102522	0.152332	-0.313043	-0.115401	-0.100084	-0.0287788	0.0198861	0.14055	-0.0337858	0.110763	-0.300058	-0.122381	-0.027214	0.0539274	-0.239574	-0.0205792	-0.040005	0.0605239	0.353023
myrcene	-0.855822	-0.793662	-0.788663	-0.842855	-0.769227	-0.785738	-0.779909	-0.608928	-0.488137	-0.472738	-0.896943	-0.876227	-0.929495	-0.915148	-0.895995	-0.806774	-0.758246	-0.581437	-0.860869	-0.858365	-0.855305	-0.843233	-0.825308	-0.7692	-0.73335	-0.653419	-0.667627	-0.532505	-0.377535	-0.270987	-0.0308891	0.209387	-0.382099	-0.279952	-0.0919006	-0.0424284	0.0310627	0.0332515	0.119036	0.0980323	-0.233212	-0.0458121	0.0418693	0.0986828	-0.339155	-0.19647	-0.204772	0.0906742	0.144595
alpha-phellandrene	-0.885887	-0.819957	-0.81529	-0.878559	-0.820652	-0.824466	-0.82447	-0.664055	-0.550019	-0.525945	-0.927058	-0.900253	-0.936246	-0.917271	-0.910739	-0.832795	-0.749385	-0.605541	-0.840701	-0.83759	-0.837432	-0.827496	-0.812812	-0.759994	-0.722949	-0.620052	-0.646141	-0.496295	-0.386483	-0.278074	0.00527167	0.219497	-0.439858	-0.323499	-0.148956	-0.100174	-0.033972	-0.0230094	0.0862381	0.0409559	-0.28867	-0.10798	0.000250931	0.0528753	-0.299022	-0.15876	-0.194356	0.121276	0.184109
[truncated: 56 more columns]
